# Supplementary material for: Dietary patterns reflecting healthy food choices are associated with lower serum LPS activity
Source: PubMed Central journal article supplement (PMC5529547; doi:10.1038/s41598-017-06885-7), 2017-07-26
Supplement: 41598_2017_6885_MOESM1_ESM.pdf [file 41598_2017_6885_MOESM1_ESM.pdf]

**Dietary patterns reflecting healthy food choices are associated with lower serum LPS activity**

Aila J Ahola, Mariann I Lassenius, Carol Forsblom, Valma Harjutsalo, Markku Lehto, and Per-Henrik Groop

**Supplementary Table 1** Basic characteristics of the validation study population

|                                      | n = 1171           |
|--------------------------------------|--------------------|
| Men (%)                              | 41                 |
| Age (years)                          | 47 (36 – 55)       |
| Diabetes duration (years)            | 27 (17 – 38)       |
| Body mass index (kg/m <sup>2</sup> ) | 25 (23 – 28)       |
| Smoking (%)                          | 14                 |
| Systolic blood pressure (mmHg)       | 135 (124 – 149)    |
| Diastolic blood pressure (mmHg)      | 77 (71 – 84)       |
| HbA <sub>1c</sub> (mmol/mol)         | 64 (56 – 73)       |
| HbA <sub>1c</sub> (%)                | 8.0 (7.3 – 8.7)    |
| Triglycerides (mmol/L)               | 0.90 (0.65 – 1.26) |
| Total cholesterol (mmol/L)           | 4.4 (3.9 – 5.0)    |
| HDL cholesterol (mmol/L)             | 1.7 (1.4 – 2.0)    |

Data are presented as frequency or median (interquartile range)

**Supplementary Table 2** Associations between reported consumption of food items in the diet questionnaire and in the 6-day food record

|                                    | Diet questionnaire | 6-day food record  | Correlation coefficient | P-value |
|------------------------------------|--------------------|--------------------|-------------------------|---------|
|                                    | Mean $\pm$ SD or % | Mean $\pm$ SD or % |                         |         |
| Coffee (cups per day)              | 3.8 $\pm$ 2.8      | 3.0 $\pm$ 2.0      | 0.77                    | <0.001  |
| Filtered coffee (%)                | 82.0               | 84.9               |                         | <0.001  |
| Tea (cups per day)                 | 0.8 $\pm$ 1.4      | 0.6 $\pm$ 1.0      | 0.72                    | <0.001  |
| Milk (glasses per day)             | 1.4 $\pm$ 1.5      | 0.9 $\pm$ 1.0      | 0.82                    | <0.001  |
| Fat free milk (%)                  | 44.2               | 47.1               |                         | <0.001  |
| Sour milk (glasses per day)        | 0.3 $\pm$ 0.7      | 0.2 $\pm$ 0.4      | 0.76                    | <0.001  |
| Fat free sour milk (%)             | 24.0               | 20.3               |                         | <0.001  |
| Yoghurt or curd (portions per day) | 0.8 $\pm$ 0.7      | 0.5 $\pm$ 0.5      | 0.68                    | <0.001  |
| Low fat yoghurt or curd (%)        | 53.4               | 41.8               |                         | <0.001  |
| Bread (slices per day)             | 4.7 $\pm$ 2.1      | 4.6 $\pm$ 2.1      | 0.63                    | <0.001  |
| Rye bread (%)                      | 85.6               | 91.0               |                         | <0.001  |
| Vegetable based spread (%)         | 67.3               | 64.4               |                         | <0.001  |

For continuous variables, data are presented as mean  $\pm$  standard deviation (e.g. number of cups of coffee per day reported in the diet questionnaire and in the 6-day food record). For these data Pearson correlation coefficients are also provided. For categorical variables, percentages are shown (e.g. percentage of individuals reporting consumption of filtered coffee in the diet questionnaire and in the 6-day food record).

**Supplementary Table 3** Frequencies of monthly intake of the food groups according to the food frequency questionnaire (FFQ) and the 6-day food record

|                        | FFQ             | 6-day food record | Correlation coefficient | P-value |
|------------------------|-----------------|-------------------|-------------------------|---------|
|                        | Mean $\pm$ SD   | Mean $\pm$ SD     |                         |         |
| Fish dishes            | 5.7 $\pm$ 5.1   | 8.3 $\pm$ 7.9     | 0.42                    | <0.001  |
| Meat dishes            | 11.7 $\pm$ 9.3  | 17.5 $\pm$ 9.9    | 0.43                    | <0.001  |
| Poultry                | 8.5 $\pm$ 7.3   | 6.5 $\pm$ 6.9     | 0.40                    | <0.001  |
| Sausages and cold cuts | 19.2 $\pm$ 17.8 | 27.0 $\pm$ 18.4   | 0.58                    | <0.001  |
| Eggs                   | 4.3 $\pm$ 5.9   | 4.6 $\pm$ 6.5     | 0.39                    | <0.001  |
| Legumes                | 5.0 $\pm$ 7.3   | 4.6 $\pm$ 7.5     | 0.23                    | <0.001  |
| Fresh vegetables       | 31.6 $\pm$ 18.2 | 34.5 $\pm$ 17.9   | 0.57                    | <0.001  |
| Cooked vegetables      | 13.2 $\pm$ 12.0 | 14.3 $\pm$ 10.5   | 0.46                    | <0.001  |
| Potatoes               | 17.1 $\pm$ 11.8 | 19.9 $\pm$ 11.8   | 0.55                    | <0.001  |
| Pasta and rice         | 8.8 $\pm$ 7.8   | 9.6 $\pm$ 8.9     | 0.42                    | <0.001  |
| Fruits and berries     | 28.1 $\pm$ 18.7 | 37.2 $\pm$ 19.3   | 0.53                    | <0.001  |
| Cheese, $\geq$ 20% fat | 8.6 $\pm$ 14.2  | 17.3 $\pm$ 18.1   | 0.51                    | <0.001  |
| Cheese, <20% fat       | 21.0 $\pm$ 19.7 | 20.5 $\pm$ 20.1   | 0.52                    | <0.001  |
| Yoghurt and curd       | 19.4 $\pm$ 16.7 | 18.6 $\pm$ 14.8   | 0.71                    | <0.001  |
| Ice cream              | 2.5 $\pm$ 4.3   | 3.9 $\pm$ 5.8     | 0.31                    | <0.001  |
| Soft drinks            | 8.7 $\pm$ 15.2  | 6.2 $\pm$ 12.2    | 0.55                    | <0.001  |
| Sweet pastries         | 7.6 $\pm$ 9.8   | 9.2 $\pm$ 12.6    | 0.25                    | <0.001  |
| Sweets and chocolate   | 6.7 $\pm$ 8.7   | 9.2 $\pm$ 2.6     | 0.48                    | <0.001  |

**Supplementary Table 4** Factor loadings of the dietary patterns formed from the food frequency questionnaire (FFQ) and 6-day food record

|                        | Healthy |      | Traditional |      | Sweets |      | Healthy snack |      | Modern |      | Cheese |       |
|------------------------|---------|------|-------------|------|--------|------|---------------|------|--------|------|--------|-------|
|                        | FFQ     | 6DFR | FFQ         | 6DFR | FFQ    | 6DFR | FFQ           | 6DFR | FFQ    | 6DFR | FFQ    | 6DFR  |
| Fish dishes            | 0.27    | 0.24 |             |      |        |      |               |      |        |      |        |       |
| Meat dishes            |         |      | 0.89        | 0.78 |        |      |               |      | 0.33   |      |        |       |
| Poultry                |         |      |             |      |        |      |               |      | 0.63   | 0.22 |        |       |
| Sausages and cold cuts |         |      | 0.22        | 0.23 |        |      |               |      |        |      |        |       |
| Eggs                   |         |      |             |      |        |      |               |      |        |      |        | 0.24  |
| Legumes                | 0.59    | 0.33 |             |      |        |      |               |      |        |      |        |       |
| Fresh vegetables       | 0.39    | 0.30 |             |      |        |      | 0.34          | 0.39 |        |      |        |       |
| Cooked vegetables      | 0.69    | 0.81 |             |      |        |      |               |      | 0.21   |      |        |       |
| Potatoes               |         |      | 0.42        | 0.34 |        |      |               |      |        |      |        |       |
| Pasta and rice         |         |      |             |      |        |      |               |      | 0.44   | 0.98 |        |       |
| Fruits and berries     | 0.27    |      |             |      |        |      | 0.60          | 0.80 |        |      |        |       |
| High-fat cheese        |         |      |             |      |        |      |               |      |        |      | 0.58   | -0.31 |
| Low-fat cheese         |         |      |             |      |        |      | 0.28          | 0.27 |        |      | -0.43  | 0.88  |
| Yoghurt and curd       |         |      |             |      |        |      | 0.51          | 0.26 |        |      |        |       |
| Ice cream              |         |      |             |      | 0.24   | 0.27 |               |      |        |      |        |       |
| Soft drinks            |         |      |             |      |        |      |               |      |        |      |        |       |
| Sweet pastries         |         |      |             |      | 0.72   | 0.96 |               |      |        |      |        |       |
| Sweets and chocolate   |         |      |             |      | 0.50   | 0.97 |               |      |        |      |        |       |

A high positive loading of a food item indicates its strong positive association with a dietary pattern, while a negative loading indicates that the food item is inversely associated with a given pattern.

**Supplementary Table 5** The proportion of individuals classified into the same, same or adjacent, and opposite quartiles, formed from the factor scores of the factor analysis of the food frequency questionnaire and the 6-day food record data, and the correlation coefficients of the factor scores for the dietary patterns

|               | Classified into |                               |                    | Correlation coefficient | <i>P</i> -value |
|---------------|-----------------|-------------------------------|--------------------|-------------------------|-----------------|
|               | same quartile   | same or adjacent<br>quartiles | opposite quartiles |                         |                 |
| Chance        | 25.0            | 62.5                          | 12.5               |                         |                 |
| Healthy snack | 40.0            | 81.0                          | 4.9                | 0.46                    | <0.001          |
| Traditional   | 34.8            | 76.0                          | 4.5                | 0.41                    | <0.001          |
| Sweets        | 33.3            | 74.0                          | 5.4                | 0.33                    | <0.001          |
| Snack         | 40.7            | 80.2                          | 3.1                | 0.51                    | <0.001          |
| Modern        | 32.9            | 71.5                          | 8.0                | 0.23                    | <0.001          |
| Cheese        | 41.9            | 78.7                          | 4.8                | -0.44                   | <0.001          |

**Supplementary Table 6** The diet questionnaire

| <b>Question</b>                                                    | <b>Type of data</b>                                                                                                                                                                                                                                                                                                                                                                  | <b>Included in the validation study</b> |
|--------------------------------------------------------------------|--------------------------------------------------------------------------------------------------------------------------------------------------------------------------------------------------------------------------------------------------------------------------------------------------------------------------------------------------------------------------------------|-----------------------------------------|
| How many cups of coffee do you usually drink per day?              | Numerical                                                                                                                                                                                                                                                                                                                                                                            | Yes                                     |
| How is the coffee made, that you usually drink?                    | <i>Multiple choice: choose the one that best describes your habits</i><br>Filtered coffee, or coffee made with coffee maker<br>Coffee cooked in a pot, or coffee made with espresso machine<br>Instant coffee<br>Other type of coffee, specify<br>I do not usually drink coffee                                                                                                      | Yes                                     |
| How many cups of tea do you usually drink per day?                 | Numerical                                                                                                                                                                                                                                                                                                                                                                            | Yes                                     |
| How many glasses (2 dl) of milk do you usually drink per day?      | Numerical                                                                                                                                                                                                                                                                                                                                                                            | Yes                                     |
| What kind of milk do you usually drink?                            | <i>Multiple choice: choose the one that best describes your habits</i><br>Skim milk or lactose free skim milk drink<br>Milk or lactose free milk drink with 1 – 1,5 % fat<br>Full fat milk or unprocessed milk from farm<br>Organic milk with 1 – 1,5 % fat<br>Skim organic milk<br>Milk with stanols or sterols added<br>Other type of milk, specify<br>I do not usually drink milk | Yes                                     |
| How many glasses (2 dl) of sour milk do you usually drink per day? | Numerical                                                                                                                                                                                                                                                                                                                                                                            | Yes                                     |
| What kind of sour milk do you usually drink?                       | <i>Multiple choice: choose the one that best describes your habits</i><br>Skim sour milk<br>Sour milk with 0,5 – 1,5 % fat<br>Sour milk with 2 % or more fat<br>Skim organic sour milk                                                                                                                                                                                               | Yes                                     |

|                                                                            |                                                                                                                                                                                                                                                                                                                                                                   |                  |                                                                  |
|----------------------------------------------------------------------------|-------------------------------------------------------------------------------------------------------------------------------------------------------------------------------------------------------------------------------------------------------------------------------------------------------------------------------------------------------------------|------------------|------------------------------------------------------------------|
| <p>How many portions (2dl) of yoghurt/curd do you usually eat per day?</p> | <p>Sour milk with stanols<br/> Other type of sour milk, specify<br/> I do not usually drink sour milk</p>                                                                                                                                                                                                                                                         | <p>Numerical</p> | <p>Yes</p>                                                       |
| <p>What kind of yoghurt/curd do you usually eat?</p>                       | <p><i>Multiple choice: choose the one that best describes your habits</i><br/> Skim or low fat yoghurt/curd<br/> Yoghurt/curd with regular amount of fat<br/> I do not usually eat yoghurt/curd</p>                                                                                                                                                               | <p>Numerical</p> | <p>Yes<br/><br/>Yes</p>                                          |
| <p>How many slices of bread do you usually eat per day?</p>                | <p><i>Multiple choice: choose all that apply</i><br/> Rye bread or bread made mainly of rye<br/> Bread made from mixed flour<br/> Wheat bread<br/> Rye crisp<br/> Other type of bread, specify _____<br/> I do not usually eat bread</p>                                                                                                                          | <p>Numerical</p> | <p>Yes<br/>Yes</p>                                               |
| <p>What kind of bread do you usually eat almost daily?</p>                 | <p><i>Multiple choice: choose the one that best describes your habits</i><br/> I do not use any spread on bread<br/> Butter<br/> Butter and vegetable oil mix<br/> Margarine with 70 – 80 % fat<br/> Low-fat spread with 65 % fat or less<br/> Margarine with stanols or sterols<br/> Unripened cheese, cheese spread or like<br/> I do not usually eat bread</p> | <p>Numerical</p> | <p>Yes</p>                                                       |
| <p>What kind of spread do you usually consume on bread?</p>                | <p><i>Multiple choice: choose the one that best describes your habits</i><br/> I do not use any fat for cooking<br/> Vegetable oil (for example olive oil, canola oil)</p>                                                                                                                                                                                        | <p>Numerical</p> | <p>No. Cooking fats were seldom reported in the food record.</p> |

- Butter
- Butter and vegetable oil mix
- Margarine or fluid margarine
- Cooking margarine
- Margarine with stanols or sterols
- I do not cook at home

How often do you add salt to your food at table?

*Multiple choice: choose the one that best describes your habits*

- Almost never
- Usually when food does not taste salty enough
- Almost always prior tasting

No. The timing of the salt addition was not specified in the food record.

Do you prefer low-salt foodstuffs?

*Multiple choice: choose the one that best describes your habits*

- Never
- Seldom
- Sometimes
- Mostly
- Always

No. Participants rarely reported the salt content of the commercial products.

Have you consumed foods or supplements with lactic acid bacteria over the preceding month?

No / Yes, trade name and dose

No. Supplements were not recorded in the food record.

Have you used any dietary supplements (for example vitamin or mineral supplements or oil capsules) over the preceding month?

No / Yes, trade name and dose

No. Supplements were not recorded in the food record.

Have you used any natural products (i.e. herbal remedies or homeopathic products) over the preceding month?

No / Yes, trade name and dose

No. Supplements were not recorded in the food record.

Have you received any instructions concerning your diet from someone working at the health care system?

*Multiple choice: choose all that apply*

- No
- Yes, from the dietitian
- Yes, from the diabetes nurse
- Yes, from the doctor
- Yes, from someone else. From whom?

No. Dietary recommendations were not queried in the food record.



When have you received instructions regarding your diet from the health care system?

*Multiple choice: choose all that apply*

- I have not received any instructions
- At the time of diabetes diagnosis
- At the time of another diagnosis: when, which diagnosis?
- At another time: when?

No. Dietary recommendations were not queried in the food record.

Do you follow the dietary instructions given to you at the health care system?

*Multiple choice: choose the one that best describes your habits*

- I have not received any instructions
- Never
- Seldom
- Sometimes
- Most of the time
- Always

No. Dietary recommendations were not queried in the food record.

Do you follow any special diet at the moment?

*Multiple choice: choose all that apply*

- No
- Low-lactose or lactose-free diet based on the diagnosis or recommendation given at health care system
- Low-lactose or lactose-free diet on my own decision
- Gluten-free diet based on the diagnosis or recommendation given at health care system
- Gluten-free diet on my own decision
- Protein restricted diet based on the diagnosis or recommendation given at health care system
- Protein restricted diet on my own decision
- Vegetarian or vegan diet based on the diagnosis or recommendation given at health care system
- Vegetarian or vegan diet on my own decision
- Vegetarian or vegan diet based on other reasons
- Other special diet, specify

No. Special diets were not specifically reported in the food record.

How often have you consumed the following food items over the preceding month?

*Multiple choice: choose the one that best describes your habits*

|                                           |                          |                                                                      |
|-------------------------------------------|--------------------------|----------------------------------------------------------------------|
|                                           | Several times a day      |                                                                      |
|                                           | Once a day               |                                                                      |
|                                           | 4-6 times a week         |                                                                      |
|                                           | 2-3 times a week         |                                                                      |
|                                           | Once a week              |                                                                      |
|                                           | 1-3 times a month        |                                                                      |
|                                           | Less frequently or never |                                                                      |
| Fish dishes                               |                          | Yes                                                                  |
| Meat dishes (cattle, pork, lamb, game)    |                          | Yes                                                                  |
| Poultry (chicken, broiler, or other bird) |                          | Yes                                                                  |
| Sausages and cold cuts                    |                          | Yes                                                                  |
| Eggs (boiled, fried, or as omelets)       |                          | Yes                                                                  |
| Peas, beans, and other legumes            |                          | Yes                                                                  |
| Fresh vegetables (salads and such)        |                          | Yes                                                                  |
| Cooked vegetables (excluding potatoes)    |                          | Yes                                                                  |
| Potatoes                                  |                          | Yes                                                                  |
| Pasta and rice                            |                          | Yes                                                                  |
| Fruits and berries (excluding juices)     |                          | Yes                                                                  |
| Cheese containing 20% fat or more         |                          | Yes                                                                  |
| Low-fat cheese (less than 20% fat)        |                          | Yes                                                                  |
| Yoghurt, curd                             |                          | Yes                                                                  |
| Ice cream                                 |                          | Yes                                                                  |
| Soft drinks                               |                          | Yes                                                                  |
| Sweet pastries (cakes, cookies and such)  |                          | Yes                                                                  |
| Sweets and chocolate                      |                          | Yes                                                                  |
| Fried and grilled foods                   |                          | No. The cooking methods were not always evident in the food records. |

---

# Supplementary information

## The Finnish Diabetic Nephropathy Study Centers

|                                                                                         |                                                                                                                                                                                                                     |
|-----------------------------------------------------------------------------------------|---------------------------------------------------------------------------------------------------------------------------------------------------------------------------------------------------------------------|
| Anjalankoski Health Center                                                              | S.Koivula, T.Uggeldahl                                                                                                                                                                                              |
| Central Finland Central Hospital, Jyväskylä                                             | T.Forslund, A.Halonen, A.Koistinen, P.Koskiahho,<br>M.Laukkanen, J.Saltevo, M.Tiihonen                                                                                                                              |
| Central Hospital of Åland Islands, Mariehamn                                            | M.Forsen, H.Granlund, A.-C.Jonsson, B.Nyroos                                                                                                                                                                        |
| Central Hospital of Kanta-Häme, Hämeenlinna                                             | P.Kinnunen, A.Orvola, T.Salonen, A.Vähänen                                                                                                                                                                          |
| Central Hospital of Kymenlaakso, Kotka                                                  | R.Paldanius, M.Riihelä, L.Ryysy                                                                                                                                                                                     |
| Central Hospital of Länsi-Pohja, Kemi                                                   | H.Laukkanen, P.Nyländen, A.Sademies                                                                                                                                                                                 |
| Central Ostrobothnian Hospital District, Kokkola                                        | S.Anderson, B.Asplund, U.Byskata, P.Liedes,<br>M.Kuusela, T.Virkkala                                                                                                                                                |
| City of Espoo Health Center:                                                            |                                                                                                                                                                                                                     |
| Espoonlahti                                                                             | A.Nikkola, E.Ritola                                                                                                                                                                                                 |
| Tapiola                                                                                 | M.Niska, H.Saarinen                                                                                                                                                                                                 |
| Samarja                                                                                 | E.Oukko-Ruponen, T.Virtanen                                                                                                                                                                                         |
| Viherlaakso                                                                             | A.Lyytinen                                                                                                                                                                                                          |
| City of Helsinki Health Center:                                                         |                                                                                                                                                                                                                     |
| Puistola                                                                                | H.Kari, T.Simonen                                                                                                                                                                                                   |
| Suutarila                                                                               | A.Kaprio, J.Kärkkäinen, B.Rantaeskola                                                                                                                                                                               |
| Töölö                                                                                   | P.Kääriäinen, J.Haaga, A-L.Pietiläinen                                                                                                                                                                              |
| City of Hyvinkää Health Center                                                          | S.Klemetti, T.Nyandoto, E.Rontu, S.Satuli-Autere                                                                                                                                                                    |
| City of Vantaa Health Center:                                                           |                                                                                                                                                                                                                     |
| Korso                                                                                   | R.Toivonen, H.Virtanen                                                                                                                                                                                              |
| Länsimäki                                                                               | R.Ahonen, M.Ivaska-Suomela, A.Jauhiainen                                                                                                                                                                            |
| Martinlaakso                                                                            | M.Laine, T.Pellonpää, R.Puranen                                                                                                                                                                                     |
| Myyrmäki                                                                                | A.Airas, J.Laakso, K.Rautavaara                                                                                                                                                                                     |
| Rekola                                                                                  | M.Erola, E.Jatkola                                                                                                                                                                                                  |
| Tikkurila                                                                               | R.Lönnblad, A.Malm, J.Mäkelä, E.Rautamo                                                                                                                                                                             |
| Heinola Health Center                                                                   | P.Hentunen, J.Lagerstam                                                                                                                                                                                             |
| Helsinki University Central Hospital, Department of<br>Medicine, Division of Nephrology | M.Feodoroff, D.Gordin, O.Heikkilä, K.Hietala, J.Fagerudd,<br>M.Korolainen, L.Kyllönen, J.Kytö, S.Lindh, K.Pettersson-Fernholm,<br>M.Rosengård-Bärlund, A.Sandelin, L.Thorn, J.Tuomikangas,<br>T.Vesisenaho, J.Wadén |
| Herttoniemi Hospital, Helsinki                                                          | V.Sipilä                                                                                                                                                                                                            |
| Hospital of Lounais-Häme, Forssa                                                        | T.Kalliomäki, J.Koskelainen, R.Nikkanen,<br>N.Savolainen, H.Sulonen, E.Valtonen                                                                                                                                     |
| Hyvinkää Hospital                                                                       | L.Norvio, A.Hämäläinen                                                                                                                                                                                              |
| Iisalmi Hospital                                                                        | E.Toivanen                                                                                                                                                                                                          |
| Jokilaakso Hospital, Jämsä                                                              | A.Parta, I.Pirttiniemi                                                                                                                                                                                              |
| Jorvi Hospital, Helsinki University Central Hospital                                    | S.Aranko, S.Ervasti, R.Kauppinen-Mäkelin,<br>A.Kuusisto, T.Leppälä, K.Nikkilä, L.Pekkonen                                                                                                                           |
| Jyväskylä Health Center, Kyllö                                                          | K.Nuorva, M.Tiihonen                                                                                                                                                                                                |
| Kainuu Central Hospital, Kajaani                                                        | S.Jokelainen, K.Kananen, M.Karjalainen, P.Kempainen, A-<br>M.Sankari                                                                                                                                                |
| M.Mankinen, A.Reponen                                                                   | H.Stuckey, P.Suominen                                                                                                                                                                                               |
| Kerava Health Center                                                                    | A.Lappalainen, M.Liimatainen, J.Santaholma                                                                                                                                                                          |
| Kirkkonummi Health Center                                                               | A.Aimolahti, E.Huovinen                                                                                                                                                                                             |
| Kivelä Hospital, Helsinki                                                               | V.Ilkka, M.Lehtimäki                                                                                                                                                                                                |
| Koskela Hospital, Helsinki                                                              | E.Pälikkö-Kontinen, A.Vanhanen                                                                                                                                                                                      |
| Kotka Health Center                                                                     | E.Koskinen, T.Siitonen                                                                                                                                                                                              |
| Kouvola Health Center                                                                   | E.Huttunen, R.Ikäheimo, P.Karhapää, P.Kekäläinen,<br>M.Laakso, T.Lakka, E.Lampainen, L.Moilanen, S.Tanskanen                                                                                                        |
| Kuopio University Hospital                                                              | L.Niskanen, U.Tuovinen, I.Vauhkonen, E.Voutilainen                                                                                                                                                                  |
| Kuusamo Health Center                                                                   | T.Kääriäinen, E.Isopoussu                                                                                                                                                                                           |
| Kuusankoski Hospital                                                                    | E.Kilki, I.Koskinen, L.Riihelä                                                                                                                                                                                      |
| Laakso Hospital, Helsinki                                                               | T.Meriläinen, P.Poukka, R.Savolainen, N.Uhlenius                                                                                                                                                                    |
| Lahti City Hospital                                                                     | A.Mäkelä, M.Tanner                                                                                                                                                                                                  |
| Lapland Central Hospital, Rovaniemi                                                     | L.Hyvärinen, K.Lampela, S.Pöykkö, T.Rompasaari, S.Severinkangas,                                                                                                                                                    |
| T.Tulokas                                                                               |                                                                                                                                                                                                                     |
| Lappeenranta Health Center                                                              | P.Erola, L.Härkönen, P.Linkola, T.Pekkanen, I.Pulli, E.Repo                                                                                                                                                         |

Lohja Hospital  
M.Tiikkainen,  
Länsi-Uusimaa Hospital, Tammisaari  
Loimaa Health Center  
Malmi Hospital, Helsinki  
Mikkeli Central Hospital

Mänttä Regional Hospital  
North Karelian Hospital, Joensuu

Nurmijärvi Health Center  
Oulaskangas Hospital, Oulainen  
Oulu Health Center  
Oulu University Hospital  
Päijät-Häme Central Hospital

Palokka Health Center  
Pieksämäki Hospital  
Pietarsaari Hospital  
Pori City Hospital  
Porvoo Hospital  
Raahe Hospital  
Rauma Hospital  
Riihimäki Hospital  
Salo Hospital  
Satakunta Central Hospital, Pori

Savonlinna Central Hospital

Seinäjoki Central Hospital

South Karelia Central Hospital, Lappeenranta  
Tampere Health Center

Tampere University Hospital  
M.Määttä,

Tiirismaa Health Center, Hollola  
Turku Health Center  
M.Viinikkala, M.Vähätalo  
Turku University Central Hospital

Vaajakoski Health Center  
Valkeakoski Regional Hospital

Vammala Regional Hospital  
Vasa Central Hospital

T.Granlund, K.Hietanen, M.Porrassalmi, M.Saari, T.Salonen,

I.-M.Jousmaa, J.Rinne  
A.Mäkelä, P.Eloranta  
H.Lanki, S.Moilanen, M.Tilly-Kiesi  
A.Gynther, R.Manninen, P.Nironen, M.Salminen,  
T.Vänttinen  
I.Pirttiniemi, A-M.Hänninen  
U-M.Henttula, P.Kekäläinen, M.Pietarinen,  
A.Rissanen, M.Voutilainen  
A.Burgos, K.Urtamo  
E.Jokelainen, P-L.Jylkkä, E.Kaarlela, J.Vuolaspuro  
L.Hiltunen, R.Häkkinen, S.Keinänen-Kiukaanniemi  
R.Ikäheimo

H.Haapamäki, A.Helanterä, S.Hämäläinen,  
V.Ilvesmäki, H.Miettinen  
P.Sopanen, L.Welling  
V.Sevtsenko, M.Tamminen  
M-L.Holmbäck, B.Isomaa, L.Sarelin  
P.Ahonen, P.Merisalo, E.Muurinen, K.Sävelä  
M.Kallio, B.Rask, S.Rämö  
A.Holma, M.Honkala, A.Tuomivaara, R.Vainionpää  
K.Laine, K.Saarinen, T.Salminen  
P.Aalto, E.Immonen, L.Juurinen  
A.Alanko, J.Lapinleimu, P.Rautio, M.Virtanen  
M.Asola, M.Juhola, P.Kunelius, M.-L.Lahdenmäki,  
P.Pääkkönen, M.Rautavirta

T.Pulli, P.Sallinen, M.Taskinen, E.Tolvanen, T.Tuominen  
H.Valtonen, A.Vartia, S-L.Viitanen

O.Antila, E.Korpi-Hyövälti, T.Latvala, E.Leijala, T.Leikkari, M.Punkari  
N.Rantamäki, H.Vähävuori  
T.Ensala, E.Hussi, R.Härkönen, U.Nyholm, J.Toivanen  
A.Vaden, P.Alarotu, E.Kujansuu, H.Kirkkopelto-Jokinen,  
M.Helin, S.Gummerus, L.Calonius, T.Niskanen, T.Kaitala,  
T.Vatanen

P. Hannula, I.Ala-Houhala, R.Kannisto, T.Kuningas, P.Lampinen,  
H.Oksala, T.Oksanen, A.Putila, H.Saha, K.Salonen, H.Tauriainen,  
S.Tulokas

T.Kivelä, L.Petlin, L.Savolainen  
A.Artukka, I.Hämäläinen, L.Lehtinen, E.Pyysalo, H.Virtamo,

K.Breitholz, R.Eskola, K.Metsärinne, U.Pietilä,  
P.Saarinen, R.Tuominen, S.Äyräpää  
K.Mäkinen, P.Sopanen  
S.Ojanen, E.Valtonen, H.Ylönen, M.Rautiainen,  
T.Immonen

I.Isomäki, R.Kroneld, L.Mustaniemi, M.Tapiolinna-Mäkelä  
S.Bergkulla, U.Hautamäki, V-A.Myllyniemi, I.Rusk
